# Supplementary material for: Deep eutectic solvents: biorenewable reaction media for Au(i)-catalysed cycloisomerisations and one-pot tandem cycloisomerisation/Diels–Alder reactions
Source: Royal Society of Chemistry journal article supplement (doi:10.1039/c5gc00656b), 2015-01-01
Supplement: c5gc00656b1.pdf [file c5gc00656b1.pdf]

## Electronic Supplementary Information

# Deep Eutectic Solvents: biorenewable reaction media for Au(I)-catalysed cycloisomerisations and one-pot tandem cycloisomerisation/Diels-Alder reactions

Cristian Vidal,<sup>a</sup> Lukas Merz,<sup>a</sup> and Joaquín García-Álvarez<sup>\*,a</sup>

*Laboratorio de Compuestos Organometálicos y Catálisis (Unidad Asociada al CSIC).  
Departamento de Química Orgánica e Inorgánica (IUQOEM), Centro de Innovación en  
Química Avanzada (ORFEO-CINQA), Facultad de Química, Universidad de Oviedo, E-  
33071, Oviedo, Spain*

## Table of Contents

|                                                                                                                      |     |
|----------------------------------------------------------------------------------------------------------------------|-----|
| <b>Drawing of the crystal structure of complex 3 showing the intermolecular aurophilic Au(I)···Au(I) interaction</b> | S2  |
| <b>Crystal data and structure refine for complex 3</b>                                                               | S2  |
| <b><sup>1</sup>H NMR spectra for furans 5a-f</b>                                                                     | S5  |
| <b><sup>1</sup>H NMR spectra for heterocycles 7a-f</b>                                                               | S8  |
| <b>References</b>                                                                                                    | S11 |

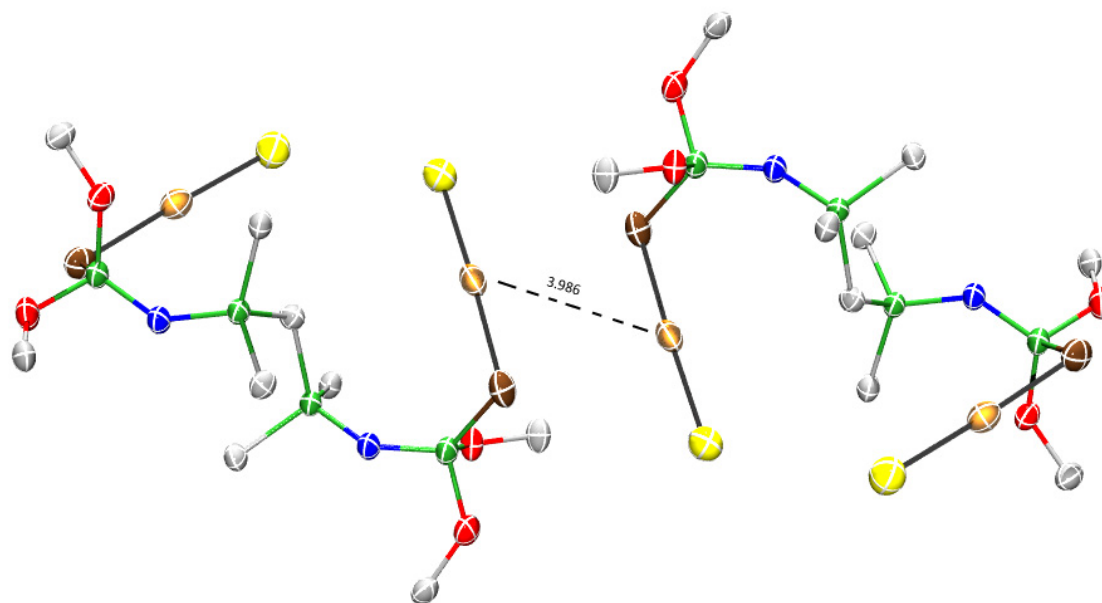

**Figure ESI-1.** Drawing of the crystal structure of complex **3** showing the intermolecular aurophilic Au(I)···Au(I) interaction.

### Crystal data and structure refine for complex **3**

Crystals suitable for X-ray diffraction analysis were obtained by slow diffusion of hexane into a saturated solution of complex **3** in dichloromethane. The most relevant crystal and refinement data are collected in Table ESI-1.

Diffraction data were recorded on an Oxford Diffraction Xcalibur Nova (Agilent) single crystal diffractometer, using Cu-K $\alpha$  radiation ( $\lambda = 1.5418$  Å). Images were collected at a 63 mm fixed crystal-detector distance, using the oscillation method, with 1° oscillation and variable exposure time per image (2-8 s). Data collection strategy was calculated with the program CryAlis Pro CCD.<sup>1</sup> Data reduction and cell refinement were performed with the programs CryAlis Pro RED.<sup>1</sup> An empirical absorption correction was applied using the SCALE3 ABSPACK algorithm as implemented in the program CryAlis Pro RED.<sup>1</sup>

The software package WINGX<sup>2</sup> was used for space group determination, structure solution and refinement. The structure was solved by direct methods using SHELXL97.<sup>3</sup>

Isotropic least-squares refinement on  $F^2$  using SHELXL97 was performed.<sup>3</sup> During the final stages of the refinements, all the positional parameters and the anisotropic temperature factors of all the non-H atoms were refined. The H atoms were

geometrically located and their coordinates were refined riding on their parent atoms. The maximum residual electron density is located near to heavy atoms.

The function minimized was  $([\sum wF_o^2 - F_c^2]/\sum w(F_o^2)]^{1/2}$  where  $w = 1/[\sigma^2(F_o^2) + (aP)^2 + bP]$  (a and b values are collected in Table ESI-1) with  $\sigma^2(F_o^2)$  from counting statistics and  $P = (\text{Max}(F_o^2, 0) + 2F_c^2)/3$ .

Atomic scattering factors were taken from the International Tables for X-Ray Crystallography.<sup>4</sup> The crystallographic plots were made with ORTEP.<sup>5</sup>

**Table ESI-1** Crystal data and structure refine for compound **3**

| <b>3</b>                                                         |                                                                                                                             |
|------------------------------------------------------------------|-----------------------------------------------------------------------------------------------------------------------------|
| Empirical formula                                                | C <sub>49</sub> H <sub>42</sub> Au <sub>2</sub> Cl <sub>2</sub> N <sub>2</sub> O <sub>4</sub> P <sub>4</sub> S <sub>2</sub> |
| Formula weight                                                   | 1375.37                                                                                                                     |
| Temperature/K                                                    | 297(4)                                                                                                                      |
| Wavelength/Å                                                     | 1.54180                                                                                                                     |
| Crystal system                                                   | monoclinic                                                                                                                  |
| Space group                                                      | C2/c                                                                                                                        |
| <i>a</i> /Å; <i>α</i> /°                                         | 25.848(2); 90.0                                                                                                             |
| <i>b</i> /Å; <i>β</i> /°                                         | 1.2564(5); 122.413(11)                                                                                                      |
| <i>c</i> /Å; <i>γ</i> /                                          | 20.6909(16); 90.0                                                                                                           |
| <i>Z</i>                                                         | 4                                                                                                                           |
| Volume/Å <sup>3</sup>                                            | 5082.2(6)                                                                                                                   |
| Calculated density/Mg m <sup>-3</sup>                            | 1.494                                                                                                                       |
| <i>μ</i> /mm <sup>-1</sup>                                       | 8.23                                                                                                                        |
| <i>F</i> (000)                                                   | 2279                                                                                                                        |
| Crystal size/mm                                                  | 0.04 x 0.08 x 0.31                                                                                                          |
| <i>θ</i> range/°                                                 | 43.15 to 94.50                                                                                                              |
| Index ranges                                                     | -25 ≤ <i>h</i> ≤ 31<br>-9 ≤ <i>k</i> ≤ 13<br>-25 ≤ <i>l</i> ≤ 18                                                            |
| No. of reflns. collected                                         | 12034                                                                                                                       |
| No. of unique reflns.                                            | 4673 [( <i>R</i> (int) = 0.0352)]                                                                                           |
| Completeness to <i>θ</i> <sub>max</sub>                          | 97.6                                                                                                                        |
| No. of parameters/restraints                                     | 298/0                                                                                                                       |
| Goodness-of-fit on <i>F</i> <sup>2</sup>                         | 1.129                                                                                                                       |
| Weight function ( <i>a</i> , <i>b</i> )                          | 0.0544, 24.1639                                                                                                             |
| <i>R</i> <sub>1</sub> [ <i>I</i> > 2σ( <i>I</i> )] <sup>a</sup>  | 0.0428                                                                                                                      |
| <i>wR</i> <sub>2</sub> [ <i>I</i> > 2σ( <i>I</i> )] <sup>a</sup> | 0.1171                                                                                                                      |
| Largest diff. peak and hole/e Å <sup>-3</sup>                    | 0.970 and -1.960                                                                                                            |

---

<sup>a</sup>  $R_1 = \frac{\sum(|F_o| - |F_c|)}{\sum|F_o|}$ ;  $wR_2 = \left\{ \frac{\sum[w(F_o^2 - F_c^2)^2]}{\sum[w(F_o^2)^2]} \right\}^{1/2}$

## 2,3-dimethylfuran (5a)

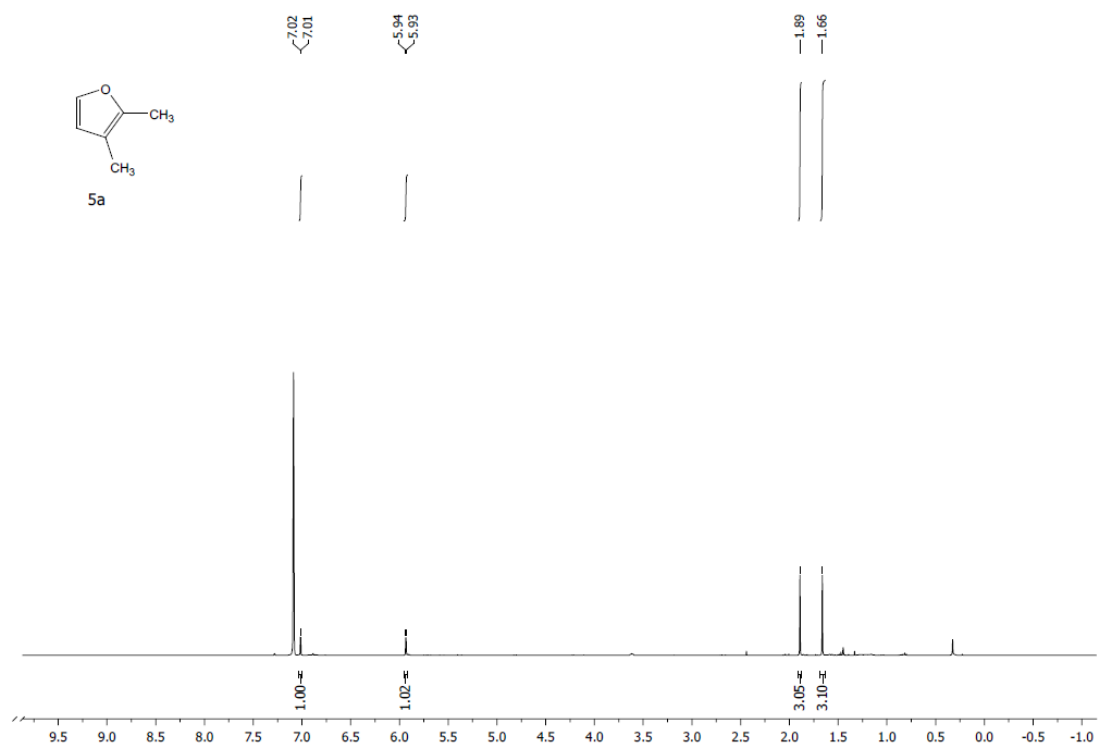

## 5-ethyl-2,3-dimethylfuran (5b)

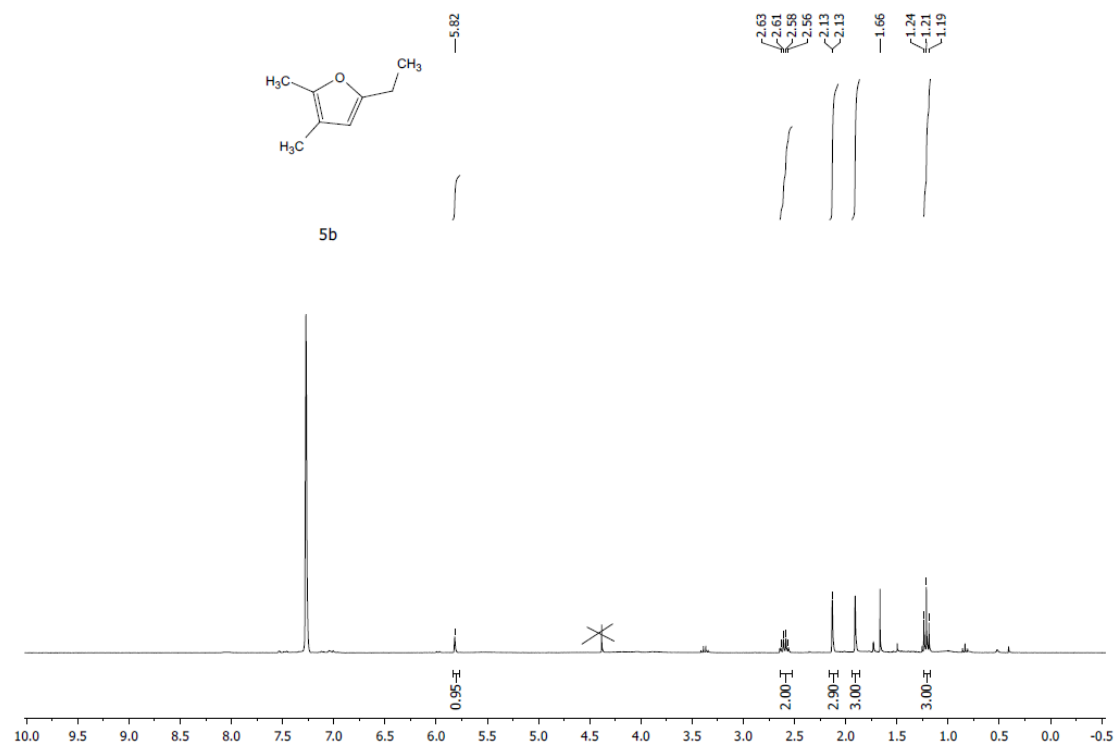

### 5-phenyl-2,3-dimethylfuran (5c)

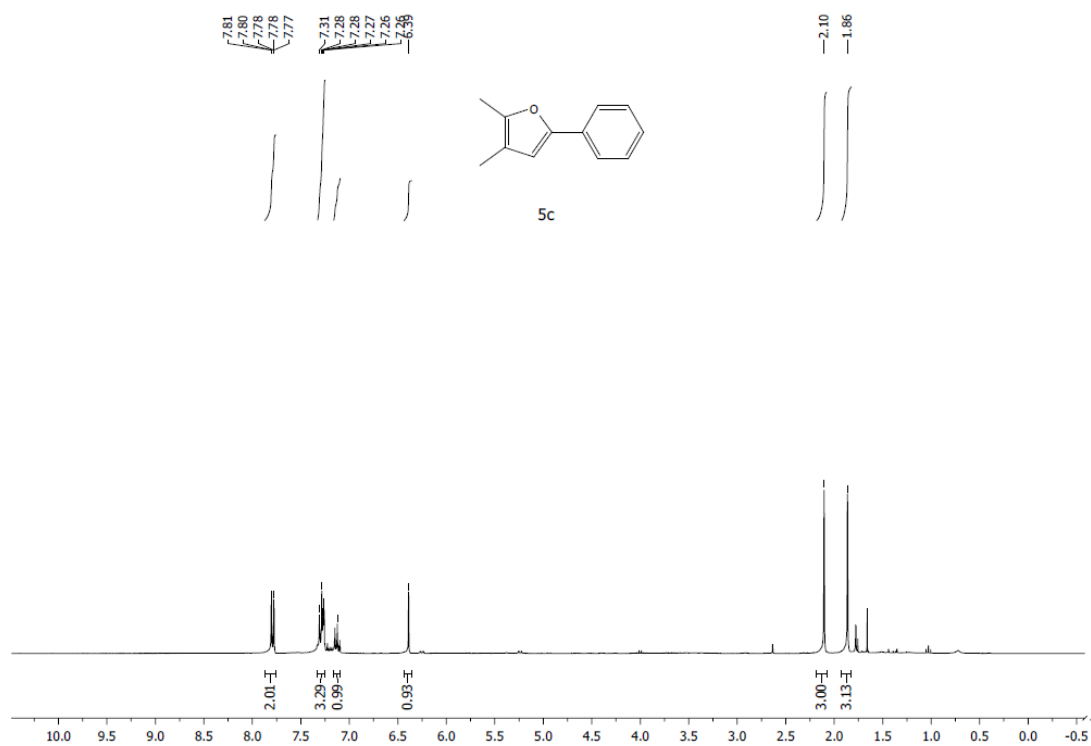

### 4,5-dimethylfuran-2-carbonitrile (5d)

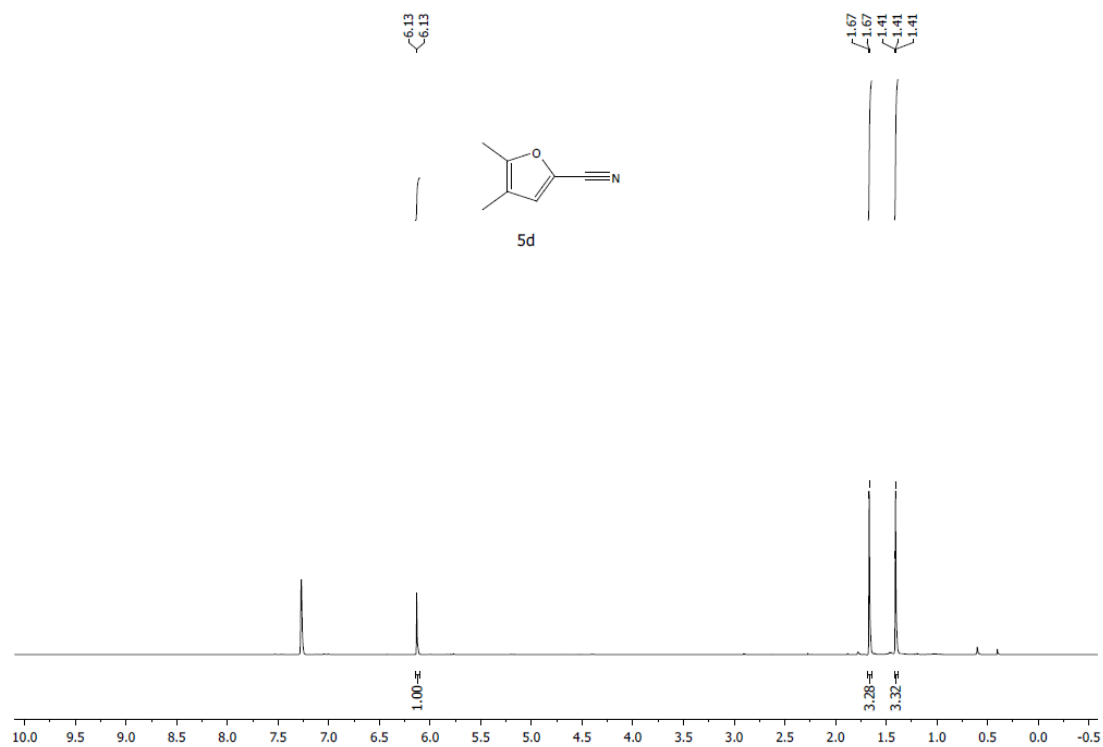

### ((4,5-dimethylfuran-2-yl)ethynyl)trimethylsilane (5e)

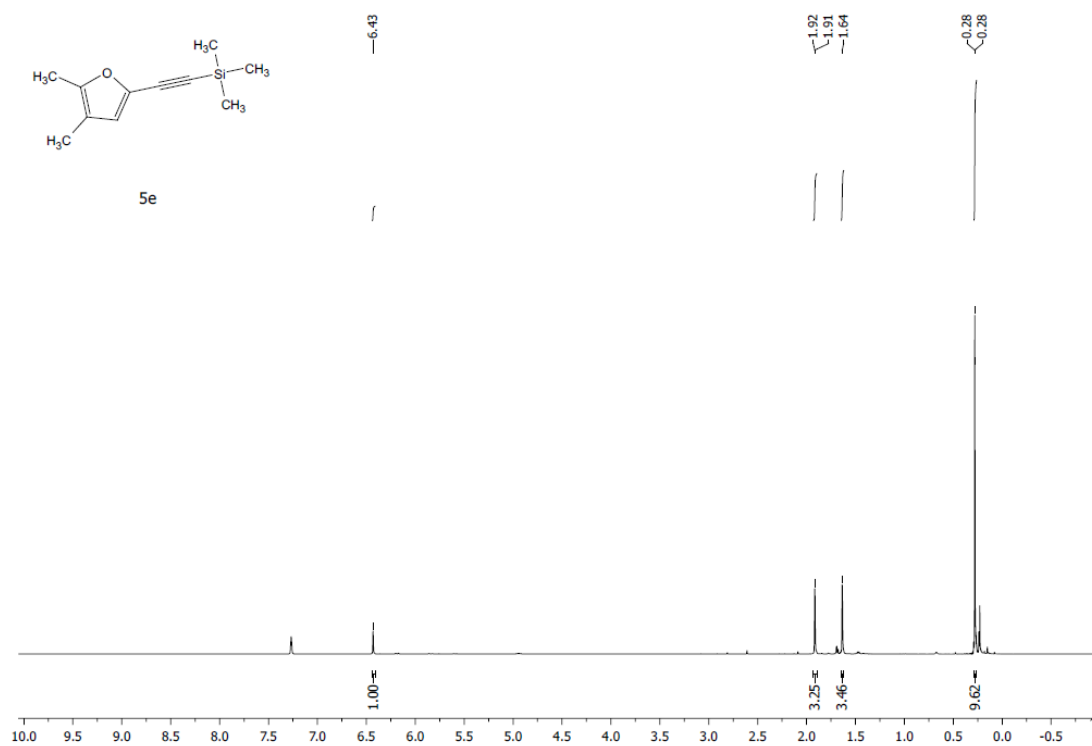

### 2-benzyl-3-methylfuran (5f)

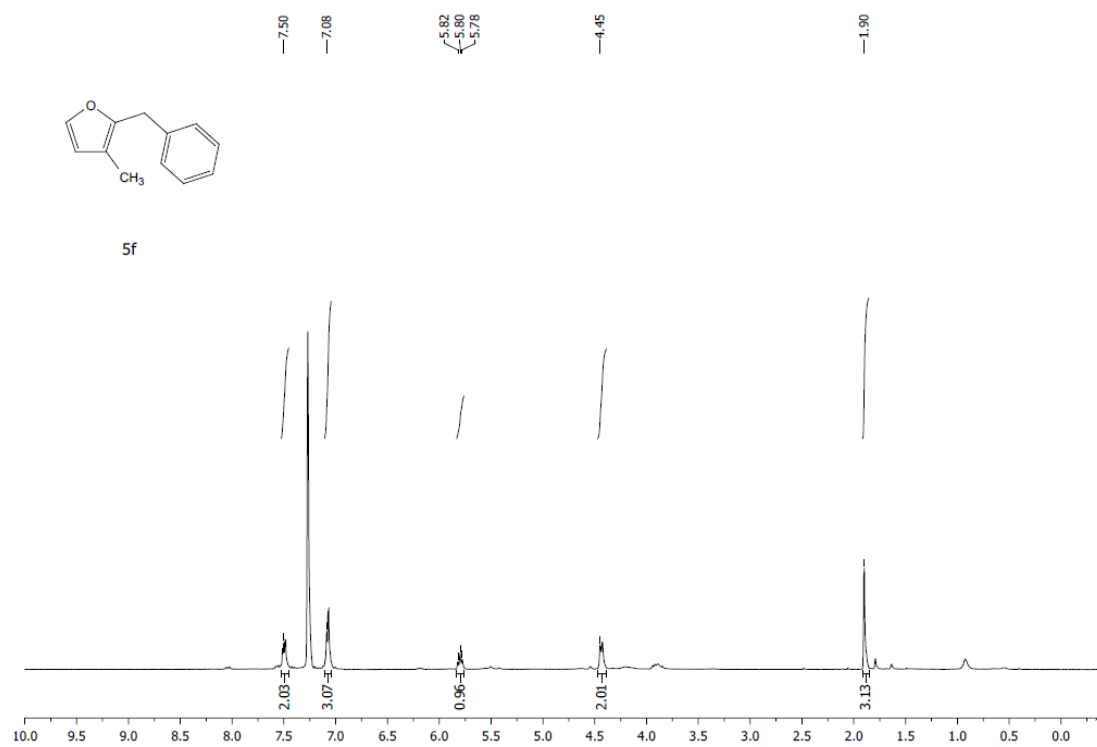

### Diethyl 1,6-dimethyl-7-oxabicyclo[2.2.1]hepta-2,5-diene-2,3-dicarboxylate (7a)

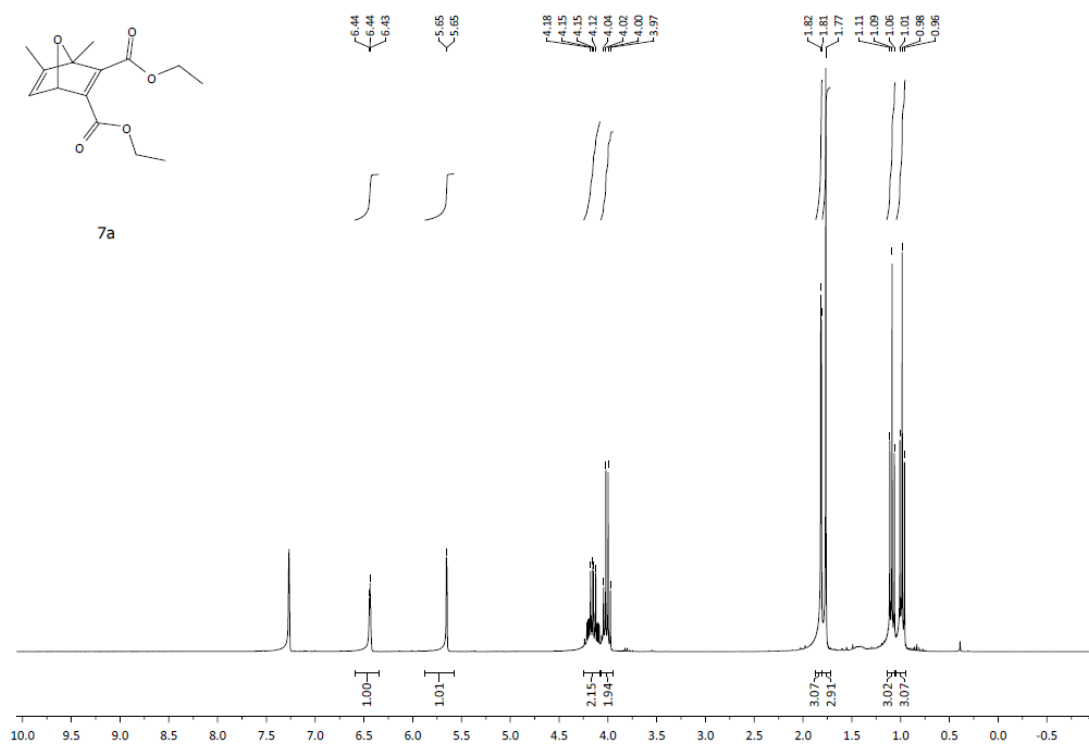

### Dimethyl 1,6-dimethyl-7-oxabicyclo[2.2.1]hepta-2,5-diene-2,3-dicarboxylate (7b)

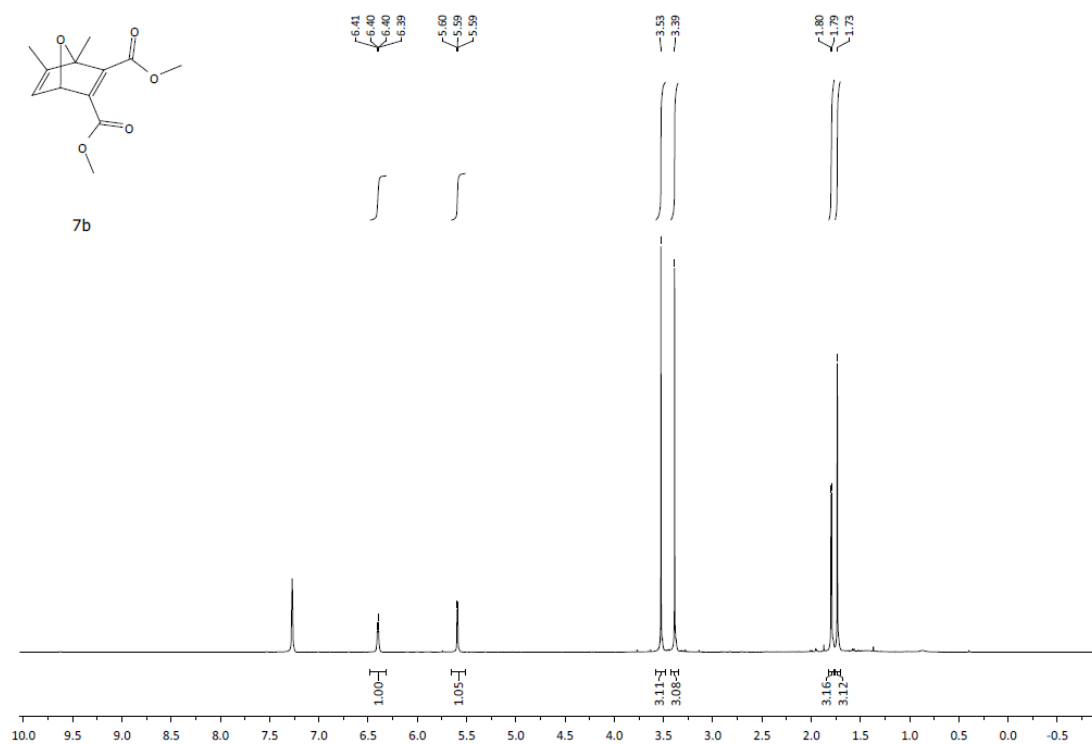



**Diethyl 1-ethyl-4,5-dimethyl-7-oxabicyclo[2.2.1]hepta-2,5-diene-2,3-dicarboxylate (7c)**

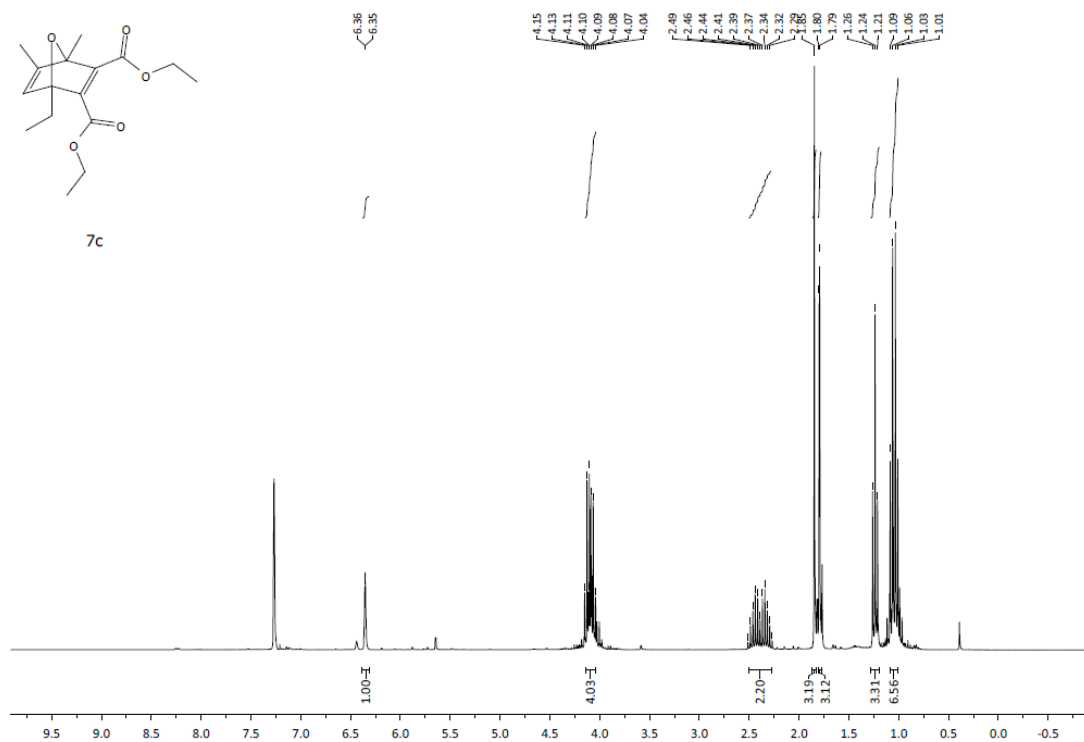

**Dimethyl 1-ethyl-4,5-dimethyl-7-oxabicyclo[2.2.1]hepta-2,5-diene-2,3-dicarboxylate (7d)**

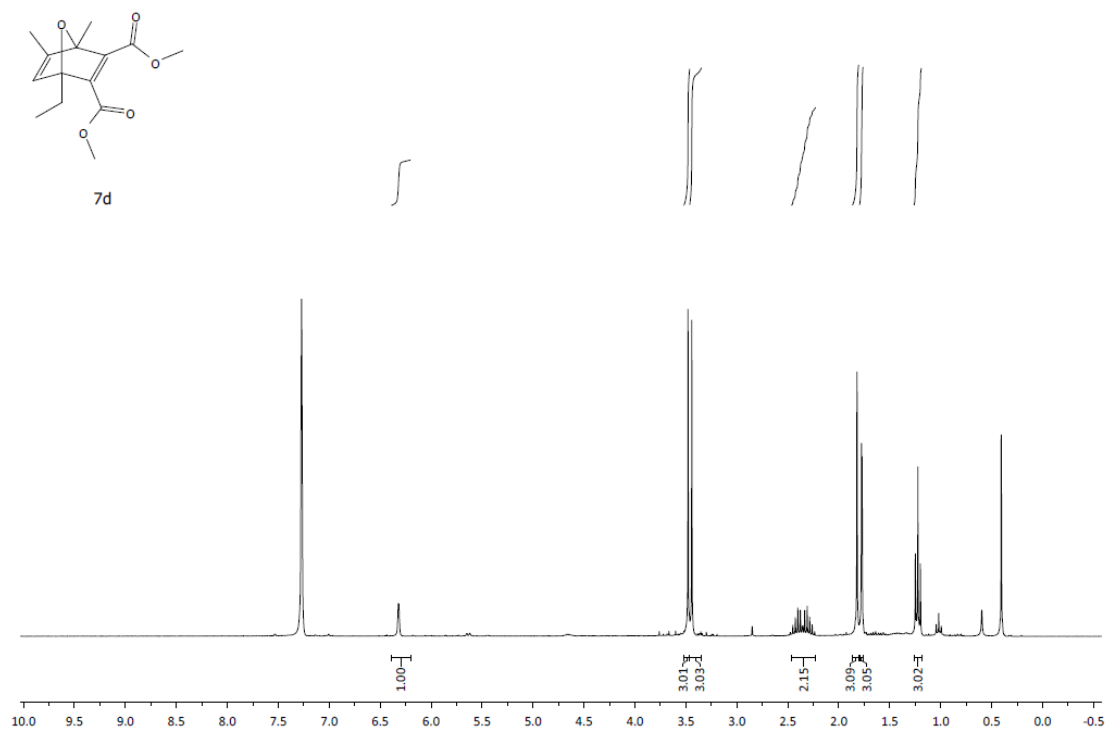

# 4,5-dimethyl-3a,4,7,7a-tetrahydro-4,7-epoxyisobenzofuran-1,3-dione (7e)

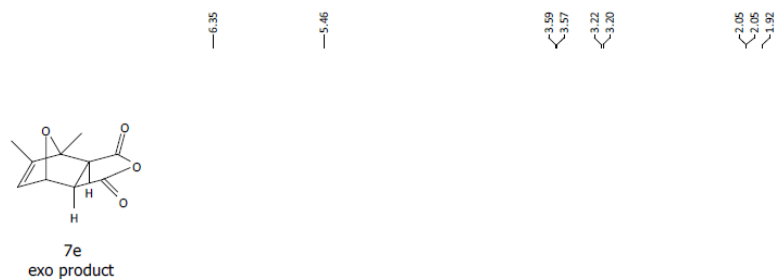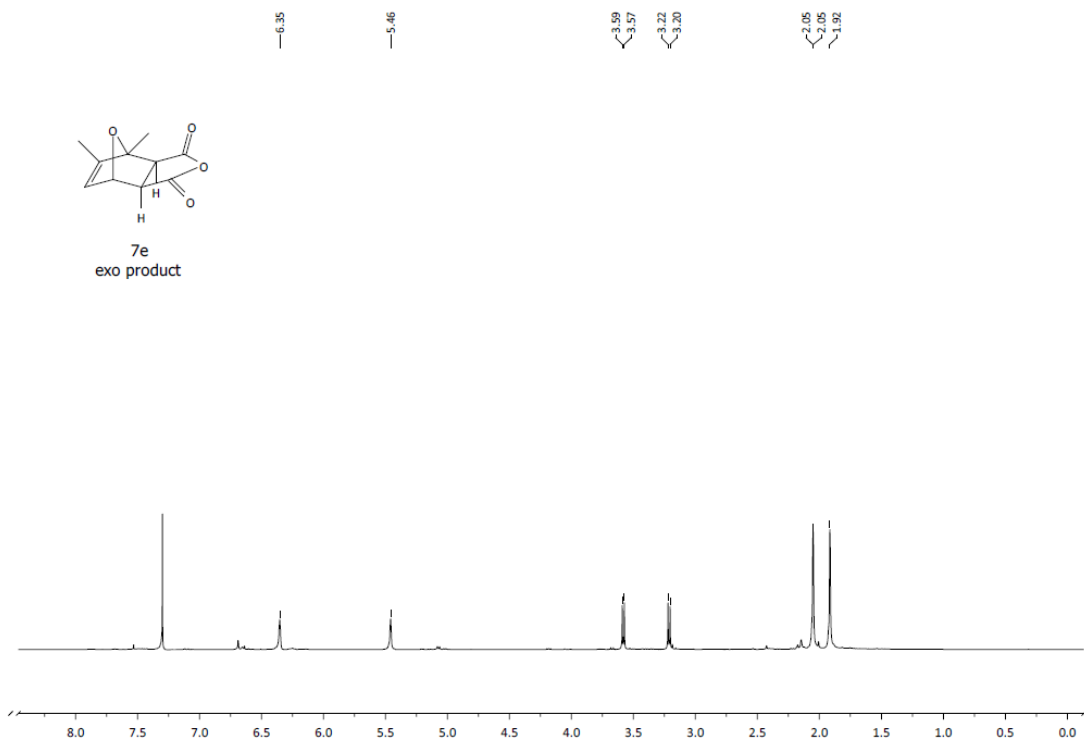

NOESY NAV400

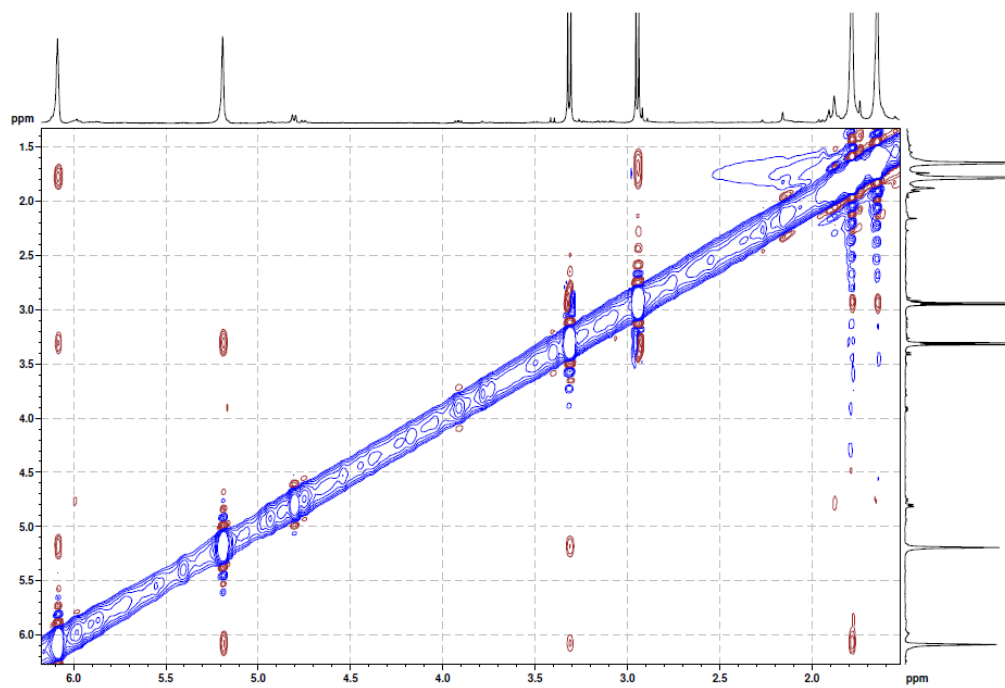

## 2,4,5-trimethyl-3a,4,7,7a-tetrahydro-1H-4,7-epoxyisoindole-1,3(2H)-dione (7f)

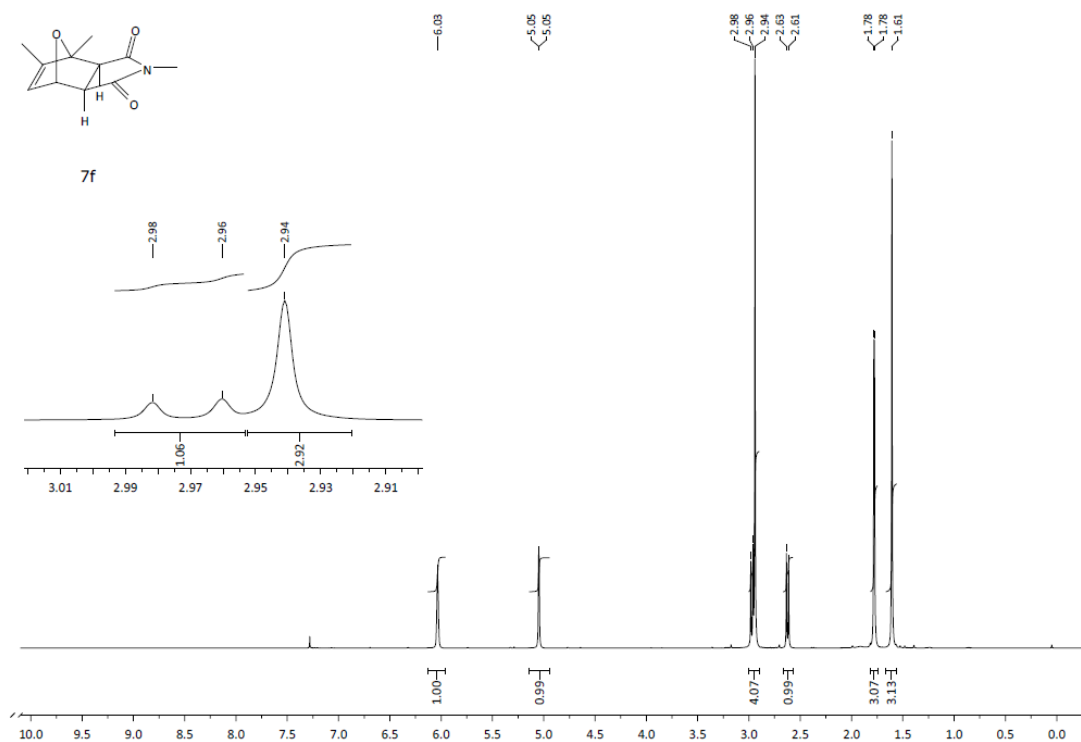

## References

- (1) *CrysAlis<sup>Pro</sup> CCD, CrysAlis<sup>Pro</sup> RED*, Oxford Diffraction Ltd., Abingdon, Oxfordshire, U.K., 2008.
- (2) L. J. Farrugia, *J. Appl. Crystallogr.*, 2012, **45**, 849.
- (3) G. M. Sheldrick, *SHELXL97: Program for the Refinement of Crystal Structures*, University of Göttingen, Göttingen, Germany, 1997.
- (4) *Tables for X-Ray Crystallography*, Kynoch Press, Birmingham, U.K., 1974, *Vol. IV* (present distributor: Kluwer Academic Publishers, Dordrecht, The Netherlands).
- (5) L. J. Farrugia, *J. Appl. Crystallogr.*, 1997, **30**, 565.
